# Supplementary material for: A novel spectroscopy-deep learning approach for aqueous multi-heavy metal detection
Source: Royal Society of Chemistry journal article supplement (doi:10.1039/d4ay01200c), 2025-01-01
Supplement: d4ay01200c1.pdf [file d4ay01200c1.pdf]

## Supporting Information

### Title:

A Novel Spectroscopy-Deep Learning Approach for Aqueous Multi-Heavy Metal  
Detection

### Author:

Zhizhi Fu<sup>a</sup>, Qianru Wan<sup>a</sup>, Qiannan Duan<sup>b</sup>, Jingzheng Lei<sup>a</sup>, Jiacong Yan<sup>a</sup>, Liulu Yao<sup>a</sup>,  
Fan Song<sup>a</sup>, Mingzhe Wu<sup>a</sup>, Chi Zhou<sup>c</sup>, WeiDong Wu<sup>c</sup>, Fei Wang<sup>c</sup>, Jianchao Lee<sup>a,\*</sup>

### Affiliation:

<sup>a</sup> Laboratory of Environmental Aquatic Chemistry, Department of Environmental  
Science, Shaanxi Normal University, Xi'an, 710062, P. R. China

<sup>b</sup> Shaanxi Key Laboratory of Earth Surface System and Environmental Canying  
Capacity. College of Upban and Environmental Sciences, Northwest University,  
Xi'an, 710127, P. R. China

<sup>c</sup> Shaanxi Key Laboratory of Environmental Monitoring and Forewarning of Trace  
Pollutants, Shaanxi Provincial Environmental Monitoring Centre, Xi'an 710127,  
P. R. China

### \*Corresponding authors:

Jianchao Lee. Shaanxi Normal University in Xi'an 710119, Shaanxi, People's  
Republic of China. E-mail: jianchaolee@snnu.edu.cn

### Supporting Information contains:

Number of Supporting Texts: 2

Number of Supporting Figures: 5

Number of Supporting Tables: 4

## Supporting Texts

### Text S1. The selection method of the mixed chromogenic agents

The process of screening chromogenic agents was conducted using a well cavity plate. Different water quality parameters (As, Cr, Cu, Ni, Pb) were employed to stimulate chromogenic reactions. Subsequent photographs of these reactions underwent computational analysis, and the corresponding RGB values were quantified using the given color difference distance formula as follows.

$$\Delta E_i = \sqrt{(R_i - R_{ck})^2 + (G_i - G_{ck})^2 + (B_i - B_{ck})^2}$$

Where  $\Delta E_i$  represents the chromatic aberration distance between the chromogenic reaction point of the i-th well cavity plate and the blank control reaction point,  $R_i$  represents the R value of the i-th image,  $G_i$  represents the G value of the i-th image,  $B_i$  represents the B value of the i-th image, and  $R_{ck}$ ,  $G_{ck}$ , and  $B_{ck}$  represent the R, G, and B values of the blank control image, respectively.

Greater discrepancies in values indicate more pronounced color changes, rendering them preferable as leading candidates for experimental chromogenic agents.

## Text S2. Calculation of instant concentration labels

The concentration of the substance to be measured in the experiment was dynamically changing, and the spectral pictures captured by the image detector carried the real-time concentration information of these substances. We calculated the exact concentration information of various substances according to the amount of substances added and the total volume of solution in the reaction cell. These data will serve as "concentration labels" for the spectral images in subsequent deep learning processes. The specific calculation formula is as follows:

$$C_i = \frac{m_i}{V_i}$$

Where  $C_i$  is the concentration value of the substance at a certain time in the reaction process,  $m_i$  is the mass of the substance at a certain time, and  $V_i$  is the total volume of the solution in the reaction pool at a certain time.

## Supporting Figures

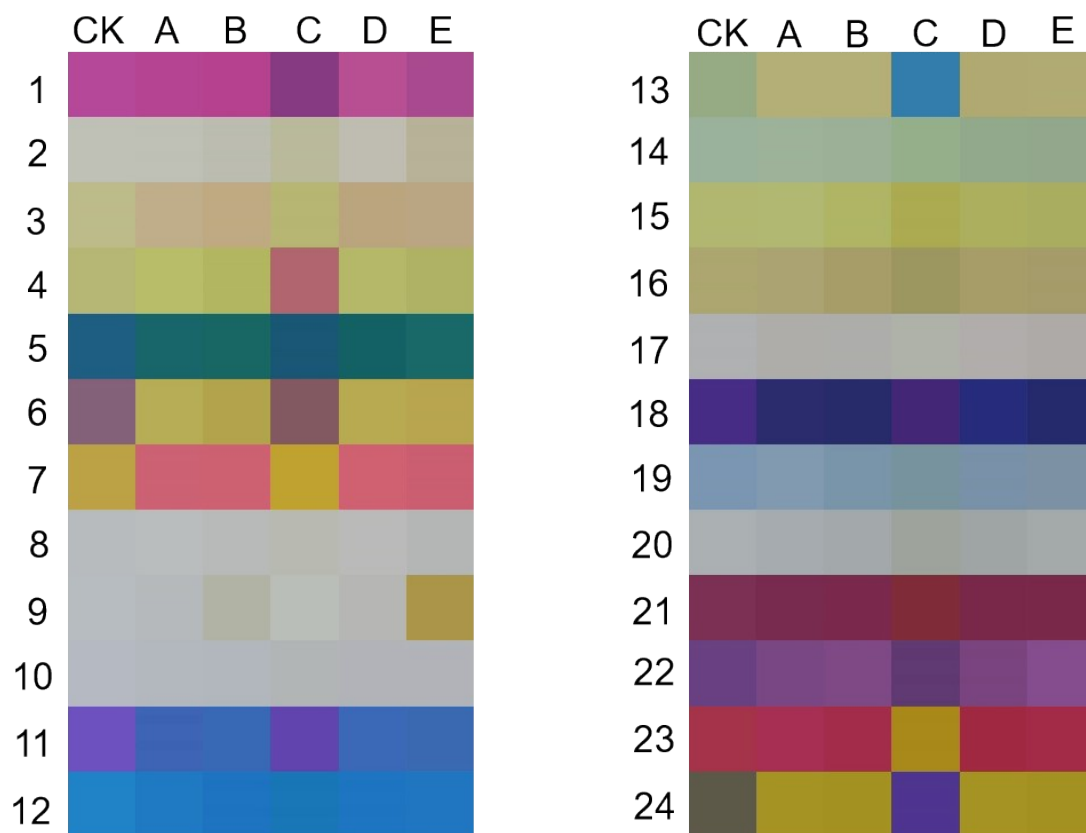

**Fig. S1.** Plot of titration experiments with well cavity plate. CK denotes the incorporation of ultrapure water as the sole substrate, while A to E denote the incorporation of 50 mg/L solutions of arsenic (As), nickel (Ni), chromium (Cr), lead (Pb), and copper (Cu) as substrates, respectively. Numbers 1 to 20 correspond to the introduction of various chromogenic agents.

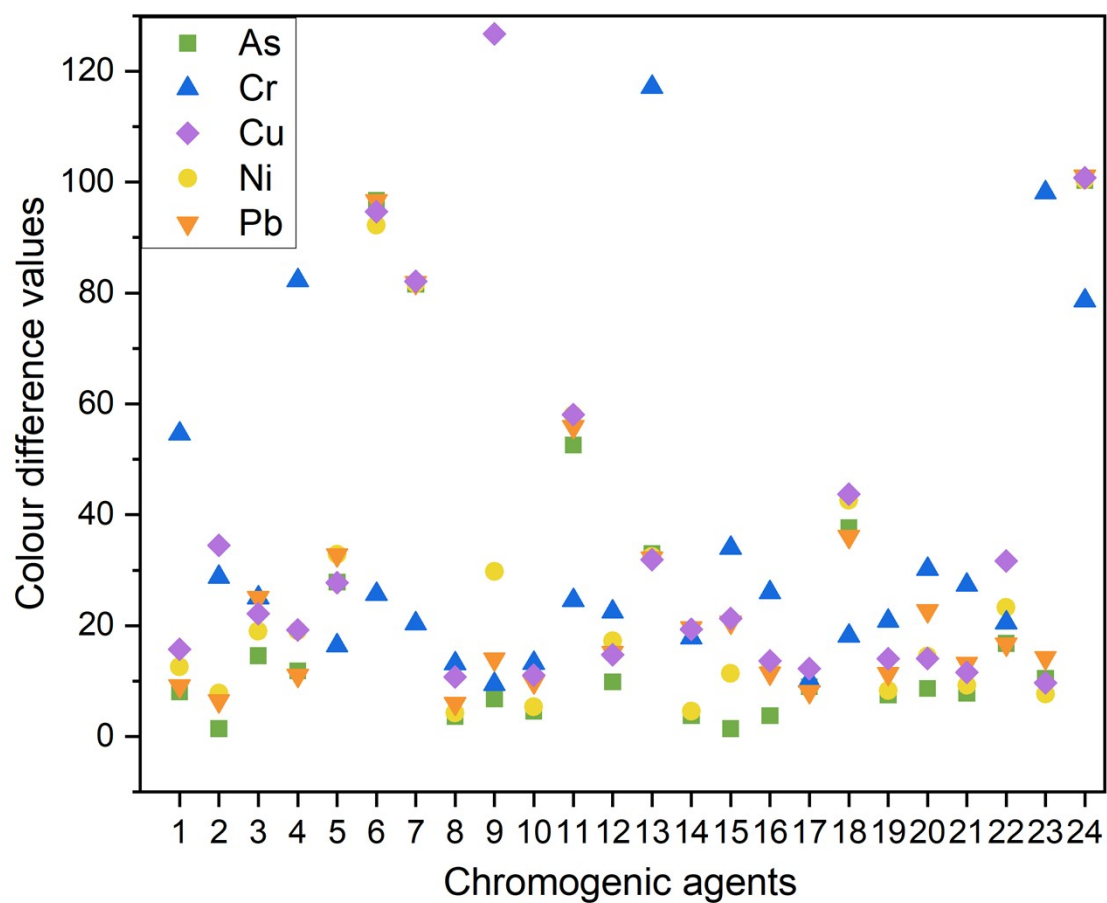

**Fig. S2.** Plot of color difference values for the well cavity plate titration experiment.

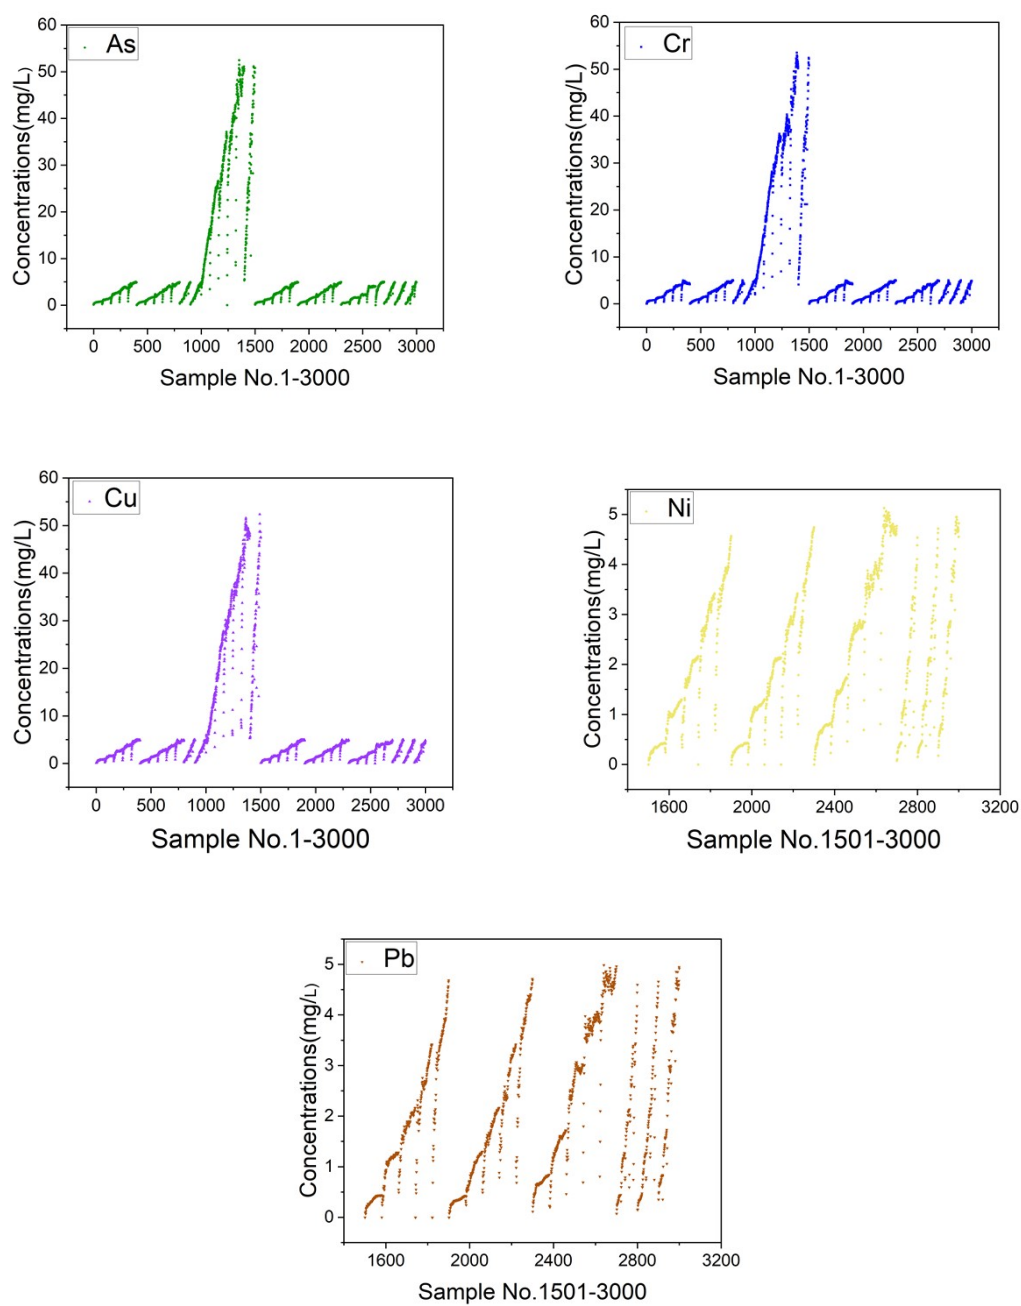

**Fig. S3.** Plot of sample concentration distribution.

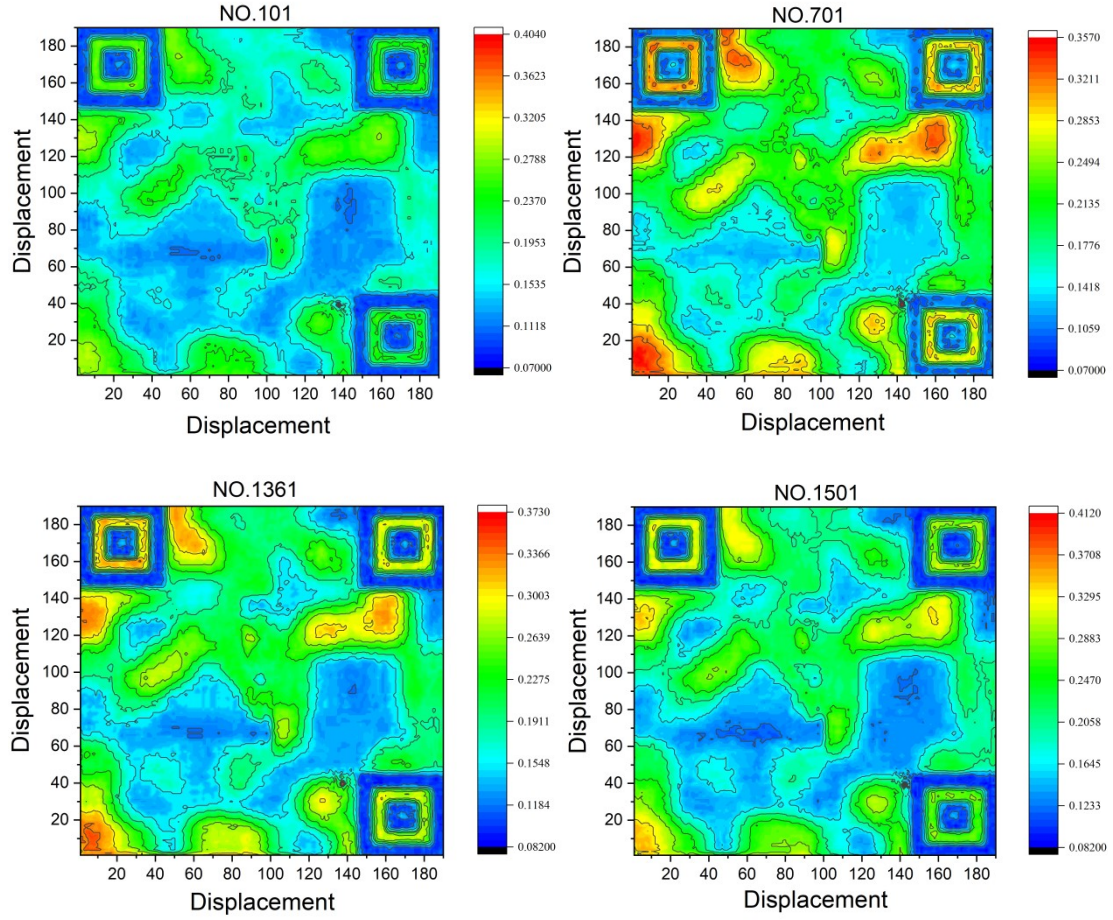

**Fig. S4.** Grey-scale contour maps of different feature images (sheet 101, 701, 1361 and 1501). Indicating that the spectroscopic apparatus can acutely capture information about the different concentrations of the sample, forming a unique characteristic spectral image.

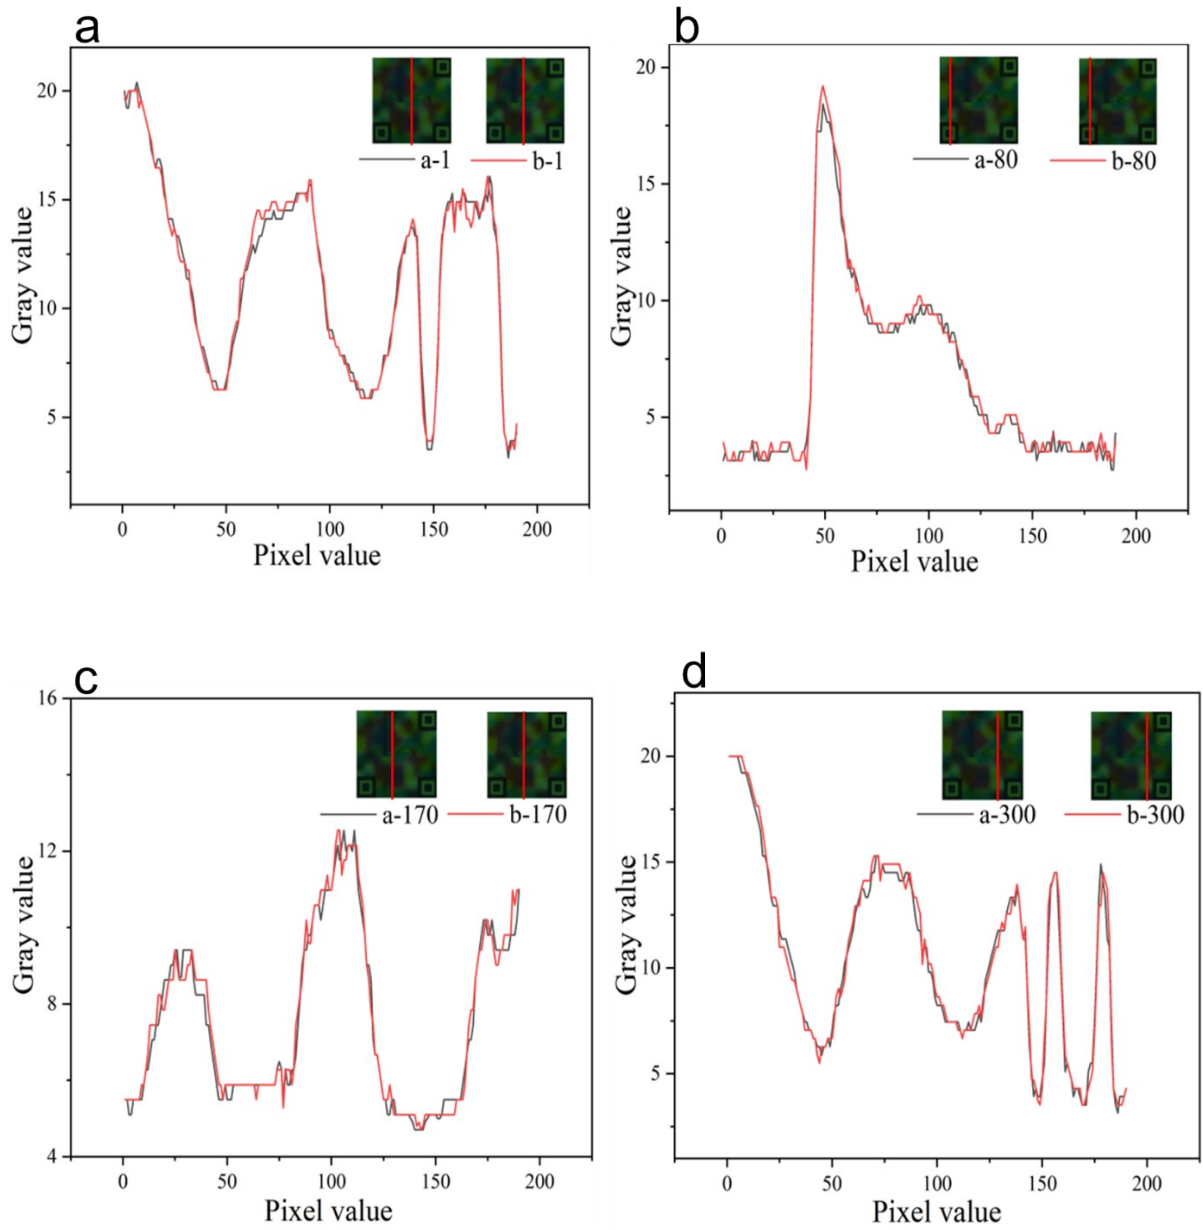

**Fig. S5.** Repeatability of feature images. (a) gray value information at  $x=95\text{px}$  for the feature image of sample #1 and its replica. (b) gray value information at  $x=11\text{px}$  for the feature image of sample #80 and its replica. (c) gray value information at  $x=89\text{px}$  for the feature image of sample #170 and its replica. (d) gray value information at  $x=150\text{px}$  for the feature image of sample #300 and its replica.



## Supporting Tables

**Table S1.** The list of chromogenic agents for screening.

| Number | Chromogenic agent                        | Number | Chromogenic agent                  |
|--------|------------------------------------------|--------|------------------------------------|
| 1      | Chromium blue SE                         | 13     | Bromocresol green                  |
| 2      | Nitroso R salt                           | 14     | Naphthol green B                   |
| 3      | Chrome azurol S                          | 15     | Pyrogallol red                     |
| 4      | Alizarin red monohydrate                 | 16     | Pyrocatechol violet                |
| 5      | Malachite green                          | 17     | Aluminon                           |
| 6      | Xylenol orange                           | 18     | Ethyl Violet                       |
| 7      | Methyl orange                            | 19     | Eriochrome black T                 |
| 8      | Tiron                                    | 20     | Sulfosalicylic acid                |
| 9      | Sodium diethyldithiocarbamate trihydrate | 21     | Neutral red                        |
| 10     | L-Ascorbic acid                          | 22     | Calcium reagent sodium carboxylate |
| 11     | Crystal violet                           | 23     | Methyl red-Thymol blue             |
| 12     | Methylene blue trihydrate                | 24     | Bromophenol blue                   |

**Table S2.** Background values of sample water quality indicators.

| Number | Coordinates              | PH   | Cr( $\mu\text{g/L}$ ) | As( $\mu\text{g/L}$ ) | Cu( $\mu\text{g/L}$ ) | Ni( $\mu\text{g/L}$ ) | Pb( $\mu\text{g/L}$ ) |
|--------|--------------------------|------|-----------------------|-----------------------|-----------------------|-----------------------|-----------------------|
| A1     | (33°54'3"N, 109°54'56"E) | 8.81 | ND                    | 0.6                   | 0.32                  | ND                    | ND                    |
| A2     | (35°1'10"N, 108°53'4"E)  | 8.52 | ND                    | 0.65                  | 0.53                  | ND                    | ND                    |
| A3     | (34°31'54"N, 107°1'18"E) | 8.82 | ND                    | 0.6                   | 0.6                   | ND                    | ND                    |

**Table S3.** Partial random addition table in experiments.

| Number | Ultrapure<br>water | Cr | As | Cu | Number | Ultrapure<br>water | Cr | As | Cu |
|--------|--------------------|----|----|----|--------|--------------------|----|----|----|
| 1      | 1                  | 0  | 1  | 1  | 1      | 0                  | 1  | 1  | 1  |
| 2      | 2                  | 0  | 1  | 0  | 2      | 0                  | 1  | 1  | 1  |
| 3      | 0                  | 1  | 1  | 1  | 3      | 2                  | 0  | 0  | 1  |
| 4      | 1                  | 0  | 1  | 1  | 4      | 1                  | 1  | 1  | 0  |
| 5      | 2                  | 1  | 0  | 0  | 5      | 0                  | 1  | 1  | 1  |
| 6      | 1                  | 1  | 1  | 0  | 6      | 2                  | 1  | 0  | 0  |
| 7      | 2                  | 1  | 0  | 0  | 7      | 0                  | 1  | 1  | 1  |
| 8      | 0                  | 1  | 1  | 1  | 8      | 2                  | 0  | 0  | 1  |
| 9      | 2                  | 0  | 0  | 1  | 9      | 0                  | 1  | 1  | 1  |
| 10     | 0                  | 1  | 1  | 1  | 10     | 1                  | 1  | 1  | 0  |
| 11     | 2                  | 0  | 0  | 1  | 11     | 1                  | 0  | 1  | 1  |
| 12     | 1                  | 1  | 0  | 1  | 12     | 1                  | 0  | 1  | 1  |
| 13     | 1                  | 1  | 0  | 1  | 13     | 1                  | 1  | 1  | 0  |
| 14     | 0                  | 1  | 1  | 1  | 14     | 2                  | 0  | 0  | 1  |
| 15     | 1                  | 1  | 1  | 0  | 15     | 2                  | 0  | 0  | 1  |
| 16     | 2                  | 1  | 0  | 0  | 16     | 2                  | 1  | 0  | 0  |
| 17     | 2                  | 0  | 1  | 0  | 17     | 1                  | 1  | 1  | 0  |
| 18     | 1                  | 0  | 1  | 1  | 18     | 1                  | 1  | 0  | 1  |
| 19     | 2                  | 0  | 0  | 1  | 19     | 1                  | 0  | 1  | 1  |
| 20     | 1                  | 0  | 1  | 1  | 20     | 1                  | 0  | 1  | 1  |
| 21     | 3                  | 0  | 0  | 0  | 21     | 2                  | 0  | 0  | 1  |
| 22     | 1                  | 1  | 1  | 0  | 22     | 1                  | 1  | 0  | 1  |
| 23     | 1                  | 1  | 0  | 1  | 23     | 2                  | 0  | 1  | 0  |
| 24     | 2                  | 0  | 1  | 0  | 24     | 2                  | 1  | 0  | 0  |
| 25     | 1                  | 1  | 0  | 1  | 25     | 2                  | 1  | 0  | 0  |
| 26     | 1                  | 1  | 1  | 0  | 26     | 2                  | 0  | 1  | 0  |
| 27     | 2                  | 0  | 1  | 0  | 27     | 1                  | 1  | 0  | 1  |
| 28     | 1                  | 1  | 0  | 1  | 28     | 1                  | 1  | 1  | 0  |
| 29     | 0                  | 1  | 1  | 1  | 29     | 1                  | 1  | 0  | 1  |
| 30     | 2                  | 0  | 0  | 1  | 30     | 2                  | 0  | 1  | 0  |
| 31     | 2                  | 0  | 0  | 1  | 31     | 2                  | 0  | 0  | 1  |
| 32     | 0                  | 1  | 1  | 1  | 32     | 2                  | 0  | 1  | 0  |
| 33     | 1                  | 1  | 1  | 0  | 33     | 2                  | 0  | 0  | 1  |
| 34     | 1                  | 1  | 1  | 0  | 34     | 1                  | 1  | 0  | 1  |
| 35     | 2                  | 0  | 0  | 1  | 35     | 1                  | 1  | 0  | 1  |
| 36     | 0                  | 1  | 1  | 1  | 36     | 1                  | 1  | 0  | 1  |
| 37     | 1                  | 1  | 0  | 1  | 37     | 1                  | 0  | 1  | 1  |
| 38     | 2                  | 0  | 0  | 1  | 38     | 1                  | 0  | 1  | 1  |
| 39     | 1                  | 1  | 1  | 0  | 39     | 1                  | 1  | 0  | 1  |

|    |   |   |   |   |    |   |   |   |   |
|----|---|---|---|---|----|---|---|---|---|
| 40 | 0 | 1 | 1 | 1 | 40 | 1 | 1 | 1 | 0 |
| 41 | 1 | 1 | 0 | 1 | 41 | 3 | 0 | 0 | 0 |
| 42 | 1 | 0 | 1 | 1 | 42 | 0 | 1 | 1 | 1 |
| 43 | 1 | 1 | 0 | 1 | 43 | 1 | 1 | 0 | 1 |
| 44 | 3 | 0 | 0 | 0 | 44 | 1 | 0 | 1 | 1 |
| 45 | 2 | 0 | 1 | 0 | 45 | 2 | 1 | 0 | 0 |
| 46 | 2 | 1 | 0 | 0 | 46 | 1 | 0 | 1 | 1 |
| 47 | 1 | 1 | 0 | 1 | 47 | 2 | 0 | 1 | 0 |
| 48 | 1 | 0 | 1 | 1 | 48 | 1 | 0 | 1 | 1 |
| 49 | 2 | 0 | 1 | 0 | 49 | 0 | 1 | 1 | 1 |
| 50 | 1 | 1 | 1 | 0 | 50 | 1 | 1 | 0 | 1 |
| 51 | 0 | 1 | 1 | 1 | 51 | 2 | 1 | 0 | 0 |
| 52 | 2 | 0 | 1 | 0 | 52 | 1 | 1 | 1 | 0 |
| 53 | 2 | 0 | 0 | 1 | 53 | 2 | 0 | 1 | 0 |
| 54 | 2 | 0 | 0 | 1 | 54 | 2 | 0 | 0 | 1 |
| 55 | 1 | 1 | 1 | 0 | 55 | 2 | 1 | 0 | 0 |
| 56 | 0 | 1 | 1 | 1 | 56 | 2 | 0 | 1 | 0 |
| 57 | 1 | 1 | 1 | 0 | 57 | 2 | 0 | 0 | 1 |
| 58 | 2 | 0 | 1 | 0 | 58 | 2 | 0 | 0 | 1 |
| 59 | 2 | 0 | 0 | 1 | 59 | 1 | 1 | 1 | 0 |
| 60 | 1 | 1 | 1 | 0 | 60 | 1 | 0 | 1 | 1 |
| 61 | 3 | 0 | 0 | 0 | 61 | 1 | 1 | 0 | 1 |
| 62 | 2 | 1 | 0 | 0 | 62 | 2 | 1 | 0 | 0 |
| 63 | 0 | 1 | 1 | 1 | 63 | 3 | 0 | 0 | 0 |
| 64 | 2 | 0 | 0 | 1 | 64 | 2 | 0 | 0 | 1 |
| 65 | 0 | 1 | 1 | 1 | 65 | 0 | 1 | 1 | 1 |
| 66 | 2 | 1 | 0 | 0 | 66 | 1 | 0 | 1 | 1 |
| 67 | 0 | 1 | 1 | 1 | 67 | 2 | 0 | 0 | 1 |
| 68 | 2 | 0 | 0 | 1 | 68 | 1 | 1 | 1 | 0 |
| 69 | 1 | 1 | 1 | 0 | 69 | 1 | 1 | 1 | 0 |
| 70 | 1 | 0 | 1 | 1 | 70 | 2 | 0 | 1 | 0 |
| 71 | 1 | 1 | 0 | 1 | 71 | 3 | 0 | 0 | 0 |
| 72 | 1 | 1 | 1 | 0 | 72 | 1 | 1 | 1 | 0 |
| 73 | 1 | 1 | 0 | 1 | 73 | 1 | 1 | 0 | 1 |
| 74 | 1 | 0 | 1 | 1 | 74 | 1 | 1 | 1 | 0 |
| 75 | 3 | 0 | 0 | 0 | 75 | 1 | 1 | 1 | 0 |
| 76 | 0 | 1 | 1 | 1 | 76 | 1 | 1 | 1 | 0 |
| 77 | 0 | 1 | 1 | 1 | 77 | 2 | 0 | 1 | 0 |
| 78 | 2 | 0 | 1 | 0 | 78 | 0 | 1 | 1 | 1 |
| 79 | 2 | 0 | 1 | 0 | 79 | 0 | 1 | 1 | 1 |
| 80 | 1 | 1 | 1 | 0 | 80 | 3 | 0 | 0 | 0 |
| 81 | 0 | 1 | 1 | 1 | 81 | 0 | 1 | 1 | 1 |
| 82 | 0 | 1 | 1 | 1 | 82 | 0 | 1 | 1 | 1 |
| 83 | 1 | 1 | 0 | 1 | 83 | 1 | 0 | 1 | 1 |

|     |   |   |   |   |     |   |   |   |   |
|-----|---|---|---|---|-----|---|---|---|---|
| 84  | 2 | 0 | 0 | 1 | 84  | 0 | 1 | 1 | 1 |
| 85  | 1 | 0 | 1 | 1 | 85  | 1 | 1 | 0 | 1 |
| 86  | 2 | 0 | 1 | 0 | 86  | 0 | 1 | 1 | 1 |
| 87  | 1 | 1 | 0 | 1 | 87  | 0 | 1 | 1 | 1 |
| 88  | 1 | 0 | 1 | 1 | 88  | 0 | 1 | 1 | 1 |
| 89  | 0 | 1 | 1 | 1 | 89  | 2 | 0 | 1 | 0 |
| 90  | 0 | 1 | 1 | 1 | 90  | 1 | 1 | 0 | 1 |
| 91  | 1 | 0 | 1 | 1 | 91  | 0 | 1 | 1 | 1 |
| 92  | 0 | 1 | 1 | 1 | 92  | 1 | 1 | 0 | 1 |
| 93  | 1 | 1 | 1 | 0 | 93  | 1 | 1 | 1 | 0 |
| 94  | 2 | 0 | 1 | 0 | 94  | 1 | 0 | 1 | 1 |
| 95  | 1 | 1 | 0 | 1 | 95  | 1 | 1 | 1 | 0 |
| 96  | 0 | 1 | 1 | 1 | 96  | 0 | 1 | 1 | 1 |
| 97  | 0 | 1 | 1 | 1 | 97  | 0 | 1 | 1 | 1 |
| 98  | 2 | 0 | 0 | 1 | 98  | 0 | 1 | 1 | 1 |
| 99  | 2 | 0 | 1 | 0 | 99  | 1 | 1 | 0 | 1 |
| 100 | 1 | 0 | 1 | 1 | 100 | 0 | 1 | 1 | 1 |

Note: 0 means no addition and 1 means addition of the solution, a total of six mother liquor concentrations (5, 10, 20, 30, 35, 50 mg/L) were used in the experiments.

**Table S4.** Detailed architecture of CNNs.

| ResNet-50 |                           |                      |
|-----------|---------------------------|----------------------|
| Layer     | Layer (type)              | Output Shape         |
| 0         | Input Layer               | (None, 224, 224, 3)  |
| 1         | Convolution Layer         | (None, 112, 112, 64) |
| 2         | Batch Normalization Layer | (None, 112, 112, 64) |
| 3         | Ramp                      | (None, 112, 112, 64) |
| 4         | Padding Layer             | (None, 113, 113, 64) |
| 5         | Pooling Layer             | (None, 56, 56, 64)   |
| 6         | NetGraph (12 nodes)       | (None, 56, 56, 256)  |
| 7         | NetGraph (10 nodes)       | (None, 56, 56, 256)  |
| 8         | NetGraph (10 nodes)       | (None, 56, 56, 256)  |
| 9         | NetGraph (12 nodes)       | (None, 28, 28, 512)  |
| 10        | NetGraph (10 nodes)       | (None, 28, 28, 512)  |
| 11        | NetGraph (10 nodes)       | (None, 28, 28, 512)  |
| 12        | NetGraph (10 nodes)       | (None, 28, 28, 512)  |
| 13        | NetGraph (12 nodes)       | (None, 14, 14, 1024) |
| 14        | NetGraph (10 nodes)       | (None, 14, 14, 1024) |
| 15        | NetGraph (10 nodes)       | (None, 14, 14, 1024) |
| 16        | NetGraph (10 nodes)       | (None, 14, 14, 1024) |
| 17        | NetGraph (10 nodes)       | (None, 14, 14, 1024) |
| 18        | NetGraph (10 nodes)       | (None, 14, 14, 1024) |
| 19        | NetGraph (12 nodes)       | (None, 7, 7, 2048)   |
| 20        | NetGraph (10 nodes)       | (None, 7, 7, 2048)   |
| 21        | NetGraph (10 nodes)       | (None, 7, 7, 2048)   |
| 22        | Pooling Layer             | (None, 1, 1, 2048)   |
| 23        | Flatten Layer             | Vector (None, 2048)  |
| 24        | Linear Layer              | Vector (None, 1000)  |
| 25        | Ramp                      | Vector (None, 1000)  |
| 26        | Linear Layer              | Vector (None, X)     |
| 27        | Output                    | Vector (None, X)     |

  

| Inception v1 |                   |                      |
|--------------|-------------------|----------------------|
| Layer        | Layer (type)      | Output Shape         |
| 0            | Input Layer       | (None, 224, 224, 3)  |
| 1            | Convolution Layer | (None, 112, 112, 64) |
| 2            | Relu function     | (None, 112, 112, 64) |
| 3            | Padding Layer     | (None, 113, 113, 64) |

|    |                                    |                     |
|----|------------------------------------|---------------------|
| 4  | Max Pooling Layer                  | (None, 56, 56, 64)  |
| 5  | Local Response Normalization Layer | (None, 56, 56, 64)  |
| 6  | Convolution Layer                  | (None, 56, 56, 64)  |
| 7  | Relu function                      | (None, 56, 56, 64)  |
| 8  | Convolution Layer                  | (None, 56, 56, 192) |
| 9  | Relu function                      | (None, 56, 56, 192) |
| 10 | Local Response Normalization Layer | (None, 56, 56, 192) |
| 11 | Max Padding Layer                  | (None, 57, 57, 192) |
| 12 | Pooling Layer                      | (None, 28, 28, 192) |
| 13 | Inception Net Graph                | (None, 28, 28, 256) |
| 14 | Inception Net Graph                | (None, 28, 28, 480) |
| 15 | Padding Layer                      | (None, 29, 29, 480) |
| 16 | Max Pooling Layer                  | (None, 14, 14, 480) |
| 17 | Inception Net Graph                | (None, 14, 14, 512) |
| 18 | Inception Net Graph                | (None, 14, 14, 512) |
| 19 | Inception Net Graph                | (None, 14, 14, 512) |
| 20 | Inception Net Graph                | (None, 14, 14, 512) |
| 21 | Inception Net Graph                | (None, 14, 14, 512) |
| 22 | Padding Layer                      | (None, 7, 7, 832)   |
| 23 | Inception Net Graph                | (None, 7, 7, 832)   |
| 24 | Linear Layer                       | (None, 7, 7, 832)   |
| 25 | Inception Net Graph                | (None, 7, 7, 1024)  |
| 26 | Max Pooling Layer                  | (None, 1, 1, 1024)  |
| 27 | Dropout Layer                      | (None, 1, 1, 1024)  |
| 28 | Flatten Layer                      | (None, 1024)        |
| 29 | Linear Layer                       | (None, 1000)        |
| 30 | Ramp                               | (None, 1000)        |
| 31 | Linear Layer                       | (None, X)           |
| 32 | Output                             | (None, X)           |

| SqueezeNet V1.1 |                    |                      |
|-----------------|--------------------|----------------------|
| Layer           | Layer (type)       | Output Shape         |
| 0               | Input Layer        | (None, 227, 227, 3)  |
| 1               | Convolution Layer  | (None, 113, 113, 64) |
| 2               | Ramp               | (None, 113, 113, 64) |
| 3               | Pooling Layer      | (None, 56, 56, 64)   |
| 4               | NetGraph (7 nodes) | (None, 56, 56, 128)  |
| 5               | NetGraph (7 nodes) | (None, 56, 56, 128)  |

|    |                    |                      |
|----|--------------------|----------------------|
| 6  | Padding Layer      | (None, 57, 57, 128)  |
| 7  | Pooling Layer      | (None, 28, 28, 128)  |
| 8  | NetGraph (7 nodes) | (None, 28, 28, 256)  |
| 9  | NetGraph (7 nodes) | (None, 28, 28, 256)  |
| 10 | Padding Layer      | (None, 29, 29, 256)  |
| 11 | Pooling Layer      | (None, 14, 14, 256)  |
| 12 | NetGraph (7 nodes) | (None, 14, 14, 384)  |
| 13 | NetGraph (7 nodes) | (None, 14, 14, 384)  |
| 14 | NetGraph (7 nodes) | (None, 14, 14, 512)  |
| 15 | NetGraph (7 nodes) | (None, 14, 14, 512)  |
| 16 | Dropout Layer      | (None, 14, 14, 512)  |
| 17 | Convolution Layer  | (None, 14, 14, 1000) |
| 18 | Convolution Layer  | (None, 14, 14, 1000) |
| 19 | Aggregation Layer  | (None, 1000)         |
| 20 | Flatten Layer      | (None, 1000)         |
| 21 | Ramp               | (None, 1000)         |
| 22 | Linear Layer       | (None, X)            |
| 23 | Output             | (None, X)            |

---
